# Supplementary material for: Two 1-D multi-nickel substituted arsenotungstate aggregates
Source: Royal Society of Chemistry journal article supplement (doi:10.1039/c0ce00983k), 2011-01-01
Supplement: c0ce00983k.pdf [file c0ce00983k.pdf]

## Electronic Supplementary Information

### Two 1-D multi-nickel substituted arsenotungstate aggregates

Junwei Zhao,<sup>\*a</sup> Dongying Shi,<sup>a</sup> Lijuan Chen,<sup>a,b</sup> Pengtao Ma,<sup>a</sup> Jingping Wang,<sup>a</sup> and Jingyang Niu<sup>\*a</sup>

<sup>a</sup> Institute of Molecular and Crystal Engineering, College of Chemistry and Chemical Engineering, Henan University, Kaifeng, Henan 475004, P. R. China. E-mail: zhaojunwei@henu.edu.cn, jyniu@henu.edu.cn, Fax: (+86) 3783886876

<sup>b</sup> Basic Experiment Teaching Center, Henan University, Kaifeng, Henan 475004 P. R. China

**1. The discussion on the location of protons in 1 and 2.**

**2. The analyses between the magnetic behavior and the structure of 1.**

**Fig. S1** IR spectra of **1** and **2**.

**Fig. S2** The packing arrangement of 1D chains in **1**.

**Fig. S3** The packing arrangement of **1** along the crystallographical *ab* plane.

**Fig. S4** Relationship of the  $\{[\text{W}_4\text{O}_{16}][\text{Ni}_3(\text{H}_2\text{O})_2(\text{en})_2]\}^{4+}$  subunit in **1** and the  $\{[\text{W}_4\text{O}_{16}][\text{Ni}_4(\text{H}_2\text{O})_2(\text{en})_2]\}^{8+}$  subunit in **2**.

**Fig. S5** The packing arrangement of 1D chains in **2**.

**Fig. S6** The packing arrangement of **2** along the crystallographical *ab* plane.

**Fig. S7** IR spectrum of  $\text{Na}_8[\text{A-}\alpha\text{-HAsW}_9\text{O}_{34}]\cdot 11\text{H}_2\text{O}$ .

**Fig. S8** UV spectra of **1** and **2**.

**Fig. S9** Field dependence of magnetization for **1** at 1.8 K.

**Table S1** The BVS values of all the oxygen atoms except the lattice water molecules in **2**.

## 1. The discussion on the location of protons in **1** and **2**.

It is well known that protons can be not precisely localized by X-ray single-crystal diffraction, but four  $\mu_3$ -OH bridges (O33, O68, O33A, O68A, A:  $1 - x, -y, -z$ ) on the  $\text{Ni}_{18}\text{As}_4\text{W}_{34}$  unit and eighteen coordination water molecules (O1W–O9W, O1WA–O9WA, A:  $1 - x, -y, -z$ ) attached to the Ni cations in **1** are completely localized by BVS calculations.<sup>1</sup> Furthermore, two free en molecules should be diprotonated to form two  $[\text{enH}_2]^{2+}$  cations. Actually, the phenomena that N-containing organic molecules are often protonated under either acidic or basic conditions are very common in POM chemistry and coordination chemistry.<sup>2</sup> For example, in 1995, Hölscher *et al.* reported a microporous solid  $[\text{H}_3\text{N}(\text{CH}_2)_6\text{NH}_3]_4[\text{W}_{18}\text{P}_2\text{O}_{62}]\cdot 3\text{H}_2\text{O}$  with protonated 1,6-diaminohexane molecules under acidic conditions.<sup>2a</sup> In 2008, Dolbecq *et al.* provided the examples  $(\text{C}_2\text{N}_2\text{H}_{10})_{11}[\{(\text{B}-\alpha\text{-PW}_9\text{O}_{34})\text{Fe}_3(\text{OH})_3\}_4(\text{PO}_4)_4\text{Fe}]\cdot 38\text{H}_2\text{O}$  and  $\text{K}_4(\text{C}_2\text{N}_2\text{H}_{10})_{12}[(\alpha\text{-PW}_{10}\text{Fe}_2\text{O}_{39})_4]\cdot 30\text{H}_2\text{O}$ , in which en molecules are also protonated under weak basic conditions.<sup>2b,3</sup> Therefore, the formula of **1** can be written as  $[\text{enH}_2]_2[\text{Ni}(\text{H}_2\text{O})_4]_2[\text{Ni}(\text{en})_2]_2[\text{Ni}(\text{en})]_2\{[(\alpha\text{-AsW}_6\text{O}_{26})\text{Ni}_6(\text{OH})_2(\text{H}_2\text{O})_3(\text{en})(\text{B}-\alpha\text{-AsW}_9\text{O}_{34})]_2[\text{W}_4\text{O}_{16}][\text{Ni}_3(\text{H}_2\text{O})_2(\text{en})]_2\}\cdot 16\text{H}_2\text{O}$ .

Four  $\mu_3$ -OH bridges (O35, O36, O35A, O36A, A:  $-x, 1 - y, 1 - z$ ) on the  $\text{Ni}_{20}\text{As}_4\text{W}_{34}$  unit and all the coordination water molecules attached to the Ni cations in **2** are completely localized by bond valence sum (BVS) calculations (Table S1).<sup>1</sup> Considering the charge-neutrality principle, it is necessary to supplement four protons to the molecular unit of **2**. To determine the possible sites binding four protons, BVS calculations have been also performed on all remaining oxygen atoms (Table S1).<sup>9</sup> The results indicate that BVS values of all remaining oxygen atoms are in the range of 1.19–2.08, which suggests that it is very difficult to accurately localize the possible sites binding four protons, as a result, four protons may be delocalized on the whole  $\text{Ni}_{20}\text{As}_4\text{W}_{34}$  framework. In fact, such phenomenon that protons are delocalized on the whole polyoxoanion backbone is very common in POM chemistry.<sup>4</sup>

1 I. D. Brown and D. Altermatt, *Acta Cryst.*, 1985, **B41**, 244.

2 (a) M. Hölscher, U. Englert, B. Zibrowius and W. F. Hölderich, *Angew. Chem., Int. Ed.*, 1995, **33**, 2491; (b) C. Pichon, A. Dolbecq, P. Mialane, J. Marrot, E. Rivière, M. Goral, M. Zynek, T. McCormac, S. A. Borshch, E. Zueva and F. Sécheresse, *Chem. Eur. J.*, 2008, **14**, 3189.

3 C. Pichon, A. Dolbecq, P. Mialane, J. Marrot, E. Rivière and F. Sécheresse, *Dalton Trans.*, 2008, 71.

- 4 (a) R. Contant and A. Tézé, *Inorg. Chem.*, 1985, **24**, 4610; (b) D.-L. Long, H. Abbas, P. Kögerler and L. Cronin, *J. Am. Chem. Soc.*, 2004, **126**, 13880; (c) H. N. Miras, J. Yan, D.-L. Long and L. Cronin, *Angew. Chem., Int. Ed.*, 2008, **47**, 8420.

## 2. The analyses on the relation between the magnetic behavior and the structure of 1.

In the molecular structural unit of **1**, apart from two pendent  $[\text{Ni}2(\text{en})]^{2+}$ ,  $[\text{Ni}2\text{A}(\text{en})]^{2+}$ , four bridging  $[\text{Ni}1(\text{en})_2]^{2+}$ ,  $[\text{Ni}1\text{A}(\text{en})_2]^{2+}$ ,  $[\text{Ni}3(\text{H}_2\text{O})_4]^{2+}$  and  $[\text{Ni}3\text{A}(\text{H}_2\text{O})_4]^{2+}$  cations, the remaining  $\text{Ni}^{\text{II}}$  centers (Ni4, Ni5, Ni6, Ni7, Ni8, Ni9, Ni10, Ni11, Ni12, Ni4A, Ni5A, Ni6A, Ni7A, Ni8A, Ni9A, Ni10A, Ni11A, Ni12A) are all anchored by two  $[\text{B-}\alpha\text{-AsW}_9\text{O}_{34}]^{9-}$ , two  $[\alpha\text{-AsW}_6\text{O}_{26}]^{11-}$  and one  $[\text{W}_4\text{O}_{16}]^{8-}$  fragments (Figures 2a,2b). On one hand, the Ni7, Ni8, Ni9, Ni10, Ni11, Ni12 group and Ni7A, Ni8A, Ni9A, Ni10A, Ni11A, Ni12A group construct two symmetrically equivalent hexa- $\text{Ni}^{\text{II}}$   $[\text{Ni}_6(\text{OH})_2(\text{H}_2\text{O})_3(\text{en})]^{10+}$  clusters, which are respectively sandwiched by a nonmagnetic  $[\text{B-}\alpha\text{-AsW}_9\text{O}_{34}]^{9-}$  fragment and a nonmagnetic  $[\alpha\text{-AsW}_6\text{O}_{26}]^{11-}$  fragment resulting in two asymmetric sandwich-type  $[(\alpha\text{-AsW}_6\text{O}_{26})\text{Ni}_6(\text{OH})_2(\text{H}_2\text{O})_3(\text{en})(\text{B-}\alpha\text{-AsW}_9\text{O}_{34})]^{10-}$  subunits (Fig. 1d). Moreover, two  $[(\alpha\text{-AsW}_6\text{O}_{26})\text{Ni}_6(\text{OH})_2(\text{H}_2\text{O})_3(\text{en})(\text{B-}\alpha\text{-AsW}_9\text{O}_{34})]^{10-}$  subunits are separated by the nonmagnetic  $[\text{W}_4\text{O}_{16}]^{8-}$  fragment. As a result, the magnetic couplings between two hexa- $\text{Ni}^{\text{II}}$   $[\text{Ni}_6(\text{OH})_2(\text{H}_2\text{O})_3(\text{en})]^{10+}$  clusters are very weak so as to be negligible, therefore, the magnetic behavior of two  $[(\alpha\text{-AsW}_6\text{O}_{26})\text{Ni}_6(\text{OH})_2(\text{H}_2\text{O})_3(\text{en})(\text{B-}\alpha\text{-AsW}_9\text{O}_{34})]^{10-}$  subunits can be viewed as the addition of the magnetic behaviors of two hexa- $\text{Ni}^{\text{II}}$   $[\text{Ni}_6(\text{OH})_2(\text{H}_2\text{O})_3(\text{en})]^{10+}$  clusters. In the hexa- $\text{Ni}^{\text{II}}$   $[\text{Ni}_6(\text{OH})_2(\text{H}_2\text{O})_3(\text{en})]^{10+}$  cluster, the  $\text{Ni}_{\text{ex}}\cdots\text{Ni}_{\text{ex}}$  distances among Ni7, Ni9 and Ni12 cations range from 6.183(3) to 6.256(3) Å while the  $\text{Ni}_{\text{in}}\cdots\text{Ni}_{\text{in}}$  /  $\text{Ni}_{\text{ex}}\cdots\text{Ni}_{\text{in}}$  separations among Ni7, Ni8, Ni9, Ni10, Ni11 and Ni12 cations are 3.074(3)–3.323(3) Å. The Ni–O–Ni bond angles are in the range of 94.1(4)–106.2(4)°. Such distribution motif of the six octahedral  $\text{Ni}^{\text{II}}$  ions has been observed in the previous studies.<sup>1,2</sup> In these studies, the magnetic behaviors of the hexa- $\text{Ni}^{\text{II}}$  clusters have been deeply investigated and the experimental and theoretical results have proved that the hexa- $\text{Ni}^{\text{II}}$  clusters show the weak ferromagnetic coupling interactions.<sup>3</sup> For example, in  $[\{\text{Ni}_6(\mu_3\text{-OH})_3(\text{en})_3(\text{H}_2\text{O})_6\}(\text{B-}\alpha\text{-PW}_9\text{O}_{34})\cdot 7\text{H}_2\text{O}]$  [ $d_{\text{Ni}_{\text{ex}}\cdots\text{Ni}_{\text{ex}}}$ : 6.232(3)–6.260(5) Å,  $d_{\text{Ni}_{\text{in}}\cdots\text{Ni}_{\text{in}}}$  /  $d_{\text{Ni}_{\text{ex}}\cdots\text{Ni}_{\text{in}}}$ : 3.108(5)–4.144(3) Å,  $\angle\text{Ni-O-Ni}$ : 91.7(2)–102.4(2)°], the magnetic exchange constant between  $\text{Ni}_{\text{ex}}$  and  $\text{Ni}_{\text{in}}$  centers is  $0.63\text{ cm}^{-1}$  and the magnetic exchange constant between  $\text{Ni}_{\text{in}}$  and  $\text{Ni}_{\text{in}}$  centers is  $1.10\text{ cm}^{-1}$ .<sup>3a</sup> In  $[\text{Ni}(\text{en})_2]_{0.5}[\{\text{Ni}_6(\mu_3\text{-OH})_3(\text{en})_3(\text{H}_2\text{O})_6\}(\text{B-}\alpha\text{-GeW}_9\text{O}_{34})\cdot 3$

$\text{H}_2\text{O}$  [ $d_{\text{Ni}_{\text{ex}}\cdots\text{Ni}_{\text{ex}}}$ : 6.185(3)–6.203(3) Å,  $d_{\text{Ni}_{\text{in}}\cdots\text{Ni}_{\text{in}}/\text{Ni}_{\text{ex}}\cdots\text{Ni}_{\text{in}}}$ : 3.079(3)–3.122(3) Å,  $\angle\text{Ni}-\text{O}-\text{Ni}$ : 93.2(4)–100.4(5)°], the magnetic exchange constant between  $\text{Ni}_{\text{ex}}$  and  $\text{Ni}_{\text{in}}$  centers is  $0.68\text{ cm}^{-1}$  and the magnetic exchange constant between  $\text{Ni}_{\text{in}}$  and  $\text{Ni}_{\text{in}}$  centers is  $1.48\text{ cm}^{-1}$ .<sup>3b</sup> Because of the same distribution motif of the six octahedral  $\text{Ni}^{\text{II}}$  ions and the similar  $\text{Ni}\cdots\text{Ni}$  distances and  $\text{Ni}-\text{O}-\text{Ni}$  angles in **1** to those in the reported hexa- $\text{Ni}^{\text{II}}$  substituted POMs, we can conclude that the hexa- $\text{Ni}^{\text{II}}$   $[\text{Ni}_6(\text{OH})_2(\text{H}_2\text{O})_3(\text{en})]^{10+}$  clusters in **1** also displays the ferromagnetic coupling interactions. Thus, the magnetic behavior of two asymmetric sandwich-type  $[(\alpha\text{-AsW}_6\text{O}_{26})\text{Ni}_6(\text{OH})_2(\text{H}_2\text{O})_3(\text{en})(\text{B-}\alpha\text{-AsW}_9\text{O}_{34})]^{10-}$  subunits should be the ferromagnetic coupling interactions. On the other hand, the Ni4, Ni5, Ni6 group and Ni4A, Ni5A, Ni6A group form two symmetrically equivalent tri- $\text{Ni}^{\text{II}}$   $[\text{Ni}_3(\text{en})(\text{H}_2\text{O})_2]^{6+}$  clusters, which respectively graft to two sides of the nonmagnetic  $[\text{W}_4\text{O}_{16}]^{8-}$  fragment generating the centric symmetric  $\{[\text{W}_4\text{O}_{16}][\text{Ni}_3(\text{H}_2\text{O})_2(\text{en})]_2\}^{4+}$  subunit (Fig. 1e). Notably, two tri- $\text{Ni}^{\text{II}}$   $[\text{Ni}_3(\text{en})(\text{H}_2\text{O})_2]^{6+}$  clusters are also separated by the nonmagnetic  $[\text{W}_4\text{O}_{16}]^{8-}$  fragment, therefore, the magnetic exchange interactions between two tri- $\text{Ni}^{\text{II}}$   $[\text{Ni}_3(\text{en})(\text{H}_2\text{O})_2]^{6+}$  clusters are negligible, so the magnetic behavior of the symmetric  $\{[\text{W}_4\text{O}_{16}][\text{Ni}_3(\text{H}_2\text{O})_2(\text{en})]_2\}^{4+}$  subunit can be also viewed as the addition of the magnetic behaviors of two tri- $\text{Ni}^{\text{II}}$   $[\text{Ni}_3(\text{en})(\text{H}_2\text{O})_2]^{6+}$  clusters. The  $[\text{Ni}_3(\text{en})(\text{H}_2\text{O})_2]^{6+}$  cluster is built by three edge-sharing  $\text{Ni}(\text{O/N})_6$  octahedra in the triangle fashion. The  $\text{Ni}\cdots\text{Ni}$  distances are in the range of 3.037(3)–3.203(3) Å and the  $\text{Ni}-\text{O}-\text{Ni}$  angles vary in 92.7(4)–100.3(4)°. Such distribution motif of the tri- $\text{Ni}^{\text{II}}$  clusters have been previously encountered.<sup>4,5</sup> Magnetic experimental and theoretical results of these tri- $\text{Ni}^{\text{II}}$  clusters have proved that the tri- $\text{Ni}^{\text{II}}$  clusters show the ferromagnetic coupling interactions.<sup>4,5</sup> For example, in  $\text{Na}_{11}[\text{Ni}_3\text{Na}(\text{H}_2\text{O})_2(\text{AsW}_9\text{O}_{34})_2]\cdot 30.5\text{H}_2\text{O}$  [ $d_{\text{Ni}\cdots\text{Ni}}$ : 3.175(6)–3.255(6) Å,  $\angle\text{Ni}-\text{O}-\text{Ni}$ : 96.0(8)–100.8(8)°], the magnetic exchange constant between  $\text{Ni}^{\text{II}}$  and  $\text{Ni}^{\text{II}}$  centers is  $4.2\text{ cm}^{-1}$ .<sup>4</sup> In  $\text{K}_6\text{Na}[\text{Ni}_3(\text{H}_2\text{O})_3\text{PW}_{10}\text{O}_{39}\text{H}_2\text{O}]\cdot 12\text{H}_2\text{O}$  [ $d_{\text{Ni}\cdots\text{Ni}}$ : 3.172–3.178 Å,  $\angle\text{Ni}-\text{O}-\text{Ni}$ : 91.9–101.0°], the magnetic exchange constant between  $\text{Ni}^{\text{II}}$  and  $\text{Ni}^{\text{II}}$  centers is  $3.9\text{ cm}^{-1}$ .<sup>5</sup> Due to the similar distribution motif of three octahedral  $\text{Ni}^{\text{II}}$  ions and the similar  $\text{Ni}\cdots\text{Ni}$  distances and  $\text{Ni}-\text{O}-\text{Ni}$  angles in **1** to those in the reported tri- $\text{Ni}^{\text{II}}$  substituted POMs, we can also conjecture that the tri- $\text{Ni}^{\text{II}}$   $[\text{Ni}_3(\text{en})(\text{H}_2\text{O})_2]^{6+}$  clusters in **1** also exhibit the ferromagnetic coupling interactions. Thus, the magnetic behavior of the  $\{[\text{W}_4\text{O}_{16}][\text{Ni}_3(\text{H}_2\text{O})_2(\text{en})]_2\}^{4+}$  subunit should be the ferromagnetic coupling interactions. From the connection mode between  $[(\alpha\text{-AsW}_6\text{O}_{26})\text{Ni}_6(\text{OH})_2(\text{H}_2\text{O})_3(\text{en})(\text{B-}\alpha\text{-AsW}_9\text{O}_{34})]^{10-}$  subunit and  $\{[\text{W}_4\text{O}_{16}][\text{Ni}_3(\text{H}_2\text{O})_2(\text{en})]_2\}^{4+}$



subunit in **1**, we can presume that the magnetic coupling interactions between  $[(\alpha\text{-AsW}_6\text{O}_{26})\text{Ni}_6(\text{OH})_2(\text{H}_2\text{O})_3(\text{en})(\text{B-}\alpha\text{-AsW}_9\text{O}_{34})]^{10-}$  and  $\{[\text{W}_4\text{O}_{16}][\text{Ni}_3(\text{H}_2\text{O})_2(\text{en})_2]_2\}^{4+}$  subunits are very weak so as to be negligible. Therefore, the magnetic behavior of **1** should be the addition of the magnetic behaviors of two  $[(\alpha\text{-AsW}_6\text{O}_{26})\text{Ni}_6(\text{OH})_2(\text{H}_2\text{O})_3(\text{en})(\text{B-}\alpha\text{-AsW}_9\text{O}_{34})]^{10-}$  subunit, one  $\{[\text{W}_4\text{O}_{16}][\text{Ni}_3(\text{H}_2\text{O})_2(\text{en})_2]_2\}^{4+}$  subunit and the paramagnetic cations ( $[\text{Ni}2(\text{en})]^{2+}$ ,  $[\text{Ni}2\text{A}(\text{en})]^{2+}$ ,  $[\text{Ni}1(\text{en})_2]^{2+}$ ,  $[\text{Ni}1\text{A}(\text{en})_2]^{2+}$ ,  $[\text{Ni}3(\text{H}_2\text{O})_4]^{2+}$  and  $[\text{Ni}3\text{A}(\text{H}_2\text{O})_4]^{2+}$ ), the ferromagnetic coupling interactions of **1** are able to be predicted. Furthermore, according to the magnitude of the magnetic exchange constants in the reported hexa-Ni<sup>II</sup> clusters<sup>3</sup> and tri-Ni<sup>II</sup> clusters<sup>4,5</sup>, the magnetic exchange interactions within Ni<sup>II</sup> centers in **1** are very weak, which is also confirmed by the result of the Curie-Weiss law ( $\theta = 4.42$  K).

1. B. Keita, I. M. Mbomekalle, L. Nadjo, T. M. Anderson and C. L. Hill, *Inorg. Chem.*, 2004, **43**, 3257.
2. (a) J. M. Clemente-Juan, E. Coronado, J. R. Galán-Mascarós and C. J. Gómez-García, *Inorg. Chem.*, 1999, **38**, 55; (b) Z. Zhang, J. Liu, E. Wang, C. Qin, Y. Li, Y. Qi and X. Wang, *Dalton Trans.*, 2008, 463; (c) J.-W. Zhao, B. Li, S.-T. Zheng and G.-Y. Yang, *Cryst. Growth Des.*, 2007, **7**, 2658.
3. (a) J.-W. Zhao, H.-P. Jia, J. Zhang, S.-T. Zheng and G.-Y. Yang, *Chem. Eur. J.*, 2007, **13**, 10030; (b) J.-W. Zhao, J. Zhang, Y. Song, S.-T. Zheng and G.-Y. Yang, *Eur. J. Inorg. Chem.*, 2008, 3809.
4. I. M. Mbomekalle, B. Keita, M. Nierlich, U. Kortz, P. Berthet and L. Nadjo, *Inorg. Chem.*, 2003, **42**, 5143.
5. J. M. Clemente-Juan, E. Coronado, J. R. Galán-Mascarós and C. J. Gómez-García, *Inorg. Chem.*, 1999, **38**, 55.

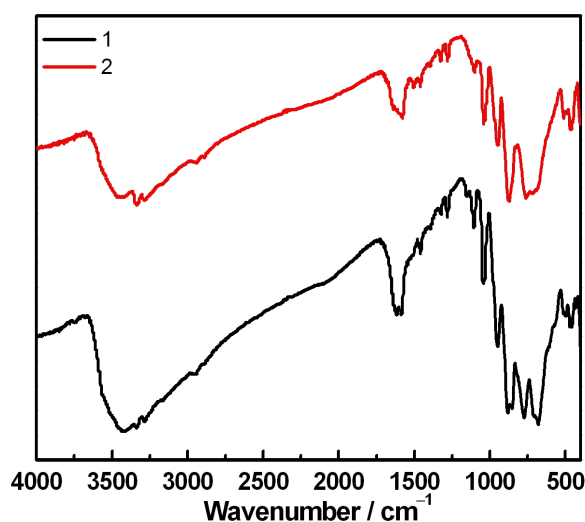

Fig. S1 IR spectra of **1** and **2**.

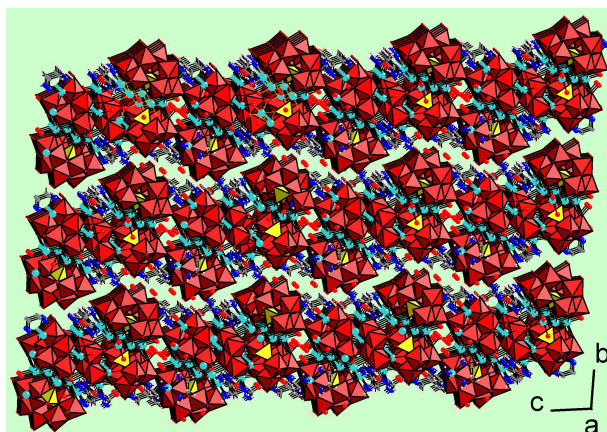

Fig. S2 The packing arrangement of 1D chains in **1**.

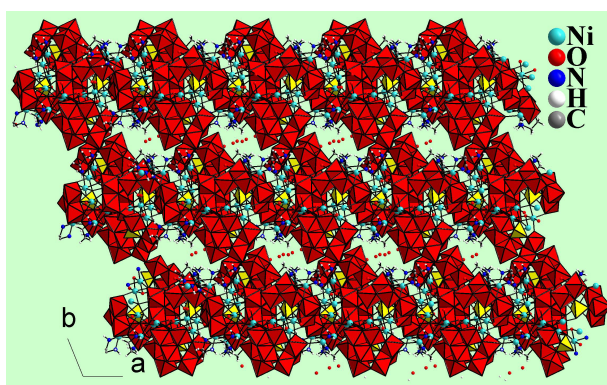

Fig. S3 The packing arrangement of **1** along the crystallographical *ab* plane.

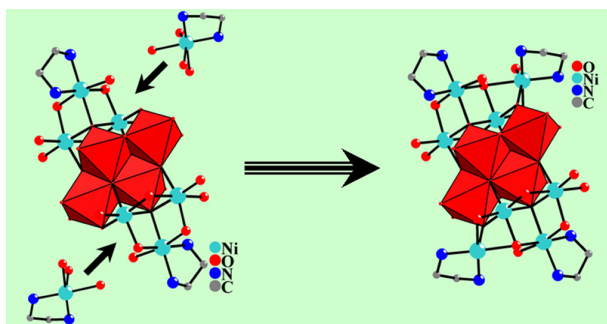

Fig. S4 Relationship of the  $\{[W_4O_{16}][Ni_3(H_2O)_2(en)]_2\}^{4+}$  subunit in **1** and the  $\{[W_4O_{16}][Ni_4(H_2O)_2(en)_2]\}^{8+}$  subunit in **2**.

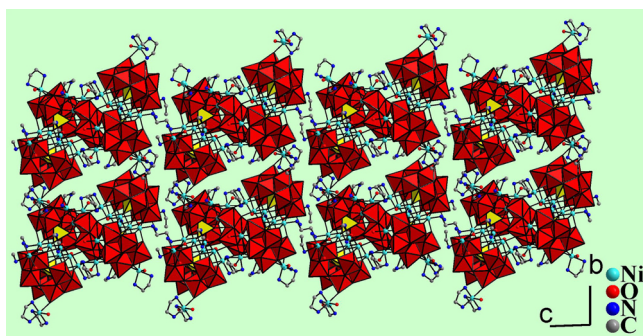

Fig. S5 The packing arrangement of 1D chains in **2**.

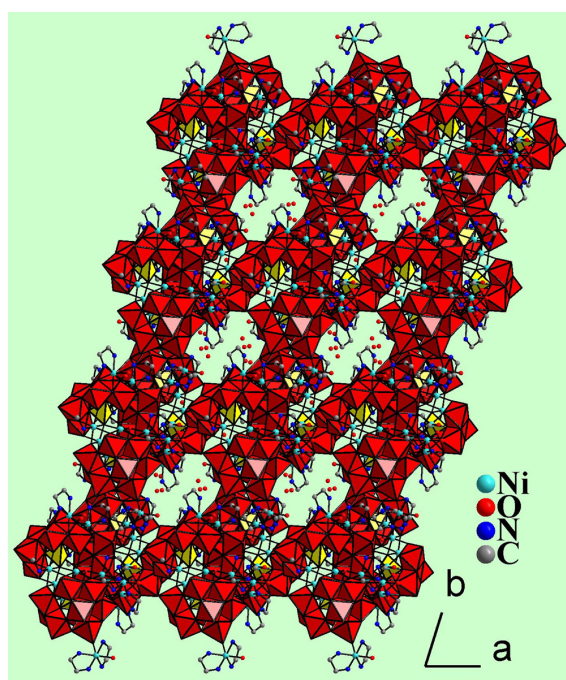

Fig. S6 The packing arrangement of **2** along the crystallographical *ab* plane.

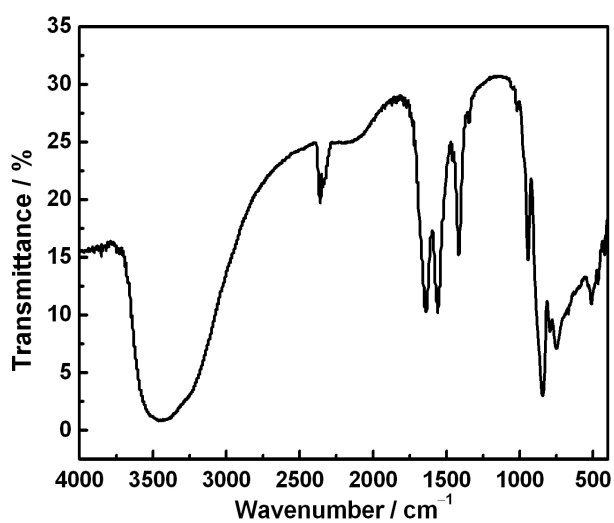

Fig. S7 IR spectrum of  $\text{Na}_8[\text{A-}\alpha\text{-HAsW}_9\text{O}_{34}] \cdot 11\text{H}_2\text{O}$ .

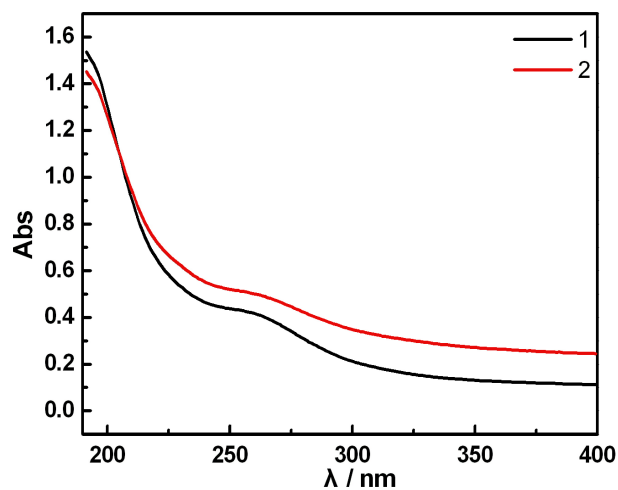

Fig. S8 UV spectra of 1 and 2.

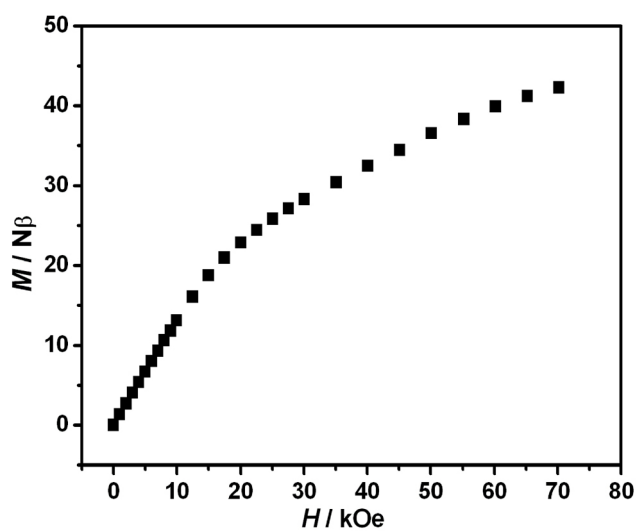

Fig. S9 Field dependence of magnetization for 1 at 1.8 K.

**Table S1** The BVS values of all the oxygen atoms except the lattice water molecules in 2.

| Atoms   | BVS values | Atoms     | BVS values | Atoms     | BVS values |
|---------|------------|-----------|------------|-----------|------------|
| O1, O1A | 1.80       | O28, O28A | 1.81       | O55, O55A | 1.73       |
| O2, O2A | 1.85       | O29, O29A | 1.85       | O56, O56A | 1.62       |
| O3, O3A | 1.86       | O30, O30A | 1.70       | O57, O57A | 1.65       |
| O4, O4A | 2.07       | O31, O31A | 1.93       | O58, O58A | 1.92       |
| O5, O5A | 1.97       | O32, O32A | 1.71       | O59, O59A | 1.64       |

|           |      |           |      |           |      |
|-----------|------|-----------|------|-----------|------|
| O6, O6A   | 1.98 | O33, O33A | 1.88 | O60, O60A | 1.89 |
| O7, O7A   | 1.75 | O34, O34A | 2.03 | O61, O61A | 1.77 |
| O8, O8A   | 2.08 | O35, O35A | 1.10 | O62, O62A | 2.02 |
| O9, O9A   | 1.89 | O36, O36A | 1.07 | O63, O63A | 1.95 |
| O10, O10A | 1.81 | O37, O37A | 1.93 | O64, O64A | 2.01 |
| O11, O11A | 2.01 | O38, O38A | 1.92 | O65, O65A | 1.77 |
| O12, O12A | 1.76 | O39, O39A | 2.05 | O66, O66A | 1.58 |
| O13, O13A | 2.08 | O40, O40A | 1.62 | O67, O67A | 1.86 |
| O14, O14A | 1.85 | O41, O41A | 1.97 | O68, O68A | 1.66 |
| O15, O15A | 1.89 | O42, O42A | 1.84 | O69, O69A | 1.79 |
| O16, O16A | 1.65 | O43, O43A | 1.87 | O70, O70A | 1.87 |
| O17, O17A | 1.88 | O44, O44A | 1.95 | O1W, O1WA | 0.26 |
| O18, O18A | 1.89 | O45, O45A | 2.06 | O2W, O2WA | 0.33 |
| O19, O19A | 1.93 | O46, O46A | 1.89 | O3W, O3WA | 0.23 |
| O20, O20A | 1.77 | O47, O47A | 1.96 | O4W, O4WA | 0.34 |
| O21, O21A | 1.86 | O48, O48A | 1.19 | O5W, O5WA | 0.38 |
| O22, O22A | 1.77 | O49, O49A | 1.68 | O6W, O6WA | 0.26 |
| O23, O23A | 1.68 | O50, O50A | 1.82 | O7W, O7WA | 0.29 |
| O24, O24A | 1.81 | O51, O51A | 1.83 |           |      |
| O25, O25A | 1.92 | O52, O52A | 1.85 |           |      |
| O26, O26A | 1.92 | O53, O53A | 2.00 |           |      |
| O27, O27A | 1.85 | O54, O54A | 1.61 |           |      |

Symmetry transformations used to generate equivalent atoms: A:  $-x, 1 - y, 1 - z$
